# Supplementary material
Source: ML conference proceedings conference paper supplement (https://proceedings.neurips.cc/paper_files/paper/2021/hash/d073bb8d0c47f317dd39de9c9f004e9d-Abstract.html)
Supplement: Supplementary file [file d073bb8d0c47f317dd39de9c9f004e9d-Supplemental.pdf]

## Appendix

Table 5: Recovery rates for individual benchmark problems.

|                          | Recovery rate (%) |                |              |              |              |
|--------------------------|-------------------|----------------|--------------|--------------|--------------|
|                          | DSR               | Random Restart | GP           | GEGL         | Ours         |
| Nguyen-1                 | 100               | 100            | 100          | 100          | 100          |
| Nguyen-2                 | 100               | 100            | 100          | 100          | 100          |
| Nguyen-3                 | 100               | 100            | 100          | 100          | 100          |
| Nguyen-4                 | 100               | 100            | 100          | 100          | 100          |
| Nguyen-5                 | 72                | 100            | 92           | 100          | 100          |
| Nguyen-6                 | 100               | 100            | 100          | 100          | 100          |
| Nguyen-7                 | 35                | 64             | 48           | 96           | 96           |
| Nguyen-8                 | 96                | 100            | 100          | 100          | 100          |
| Nguyen-9                 | 100               | 100            | 100          | 100          | 100          |
| Nguyen-10                | 100               | 100            | 92           | 100          | 100          |
| Nguyen-11                | 100               | 100            | 100          | 100          | 100          |
| Nguyen-12*               | 0                 | 0              | 0            | 12           | 12           |
| <b>Nguyen average</b>    | 83.58             | 88.67          | 86.00        | <b>92.33</b> | <b>92.33</b> |
| R-1*                     | 0                 | 4              | 0            | 4            | 4            |
| R-2*                     | 0                 | 0              | 0            | 4            | 4            |
| R-3*                     | 0                 | 4              | 100          | 92           | 92           |
| <b>R average</b>         | 0.00              | 2.67           | <b>33.33</b> | <b>33.33</b> | <b>33.33</b> |
| Livermore-1              | 3                 | 100            | 100          | 100          | 100          |
| Livermore-2              | 87                | 92             | 44           | 100          | 100          |
| Livermore-3              | 66                | 100            | 100          | 100          | 100          |
| Livermore-4              | 76                | 100            | 100          | 100          | 100          |
| Livermore-5              | 0                 | 0              | 0            | 4            | 4            |
| Livermore-6              | 97                | 4              | 64           | 88           | 88           |
| Livermore-7              | 0                 | 0              | 0            | 0            | 0            |
| Livermore-8              | 0                 | 0              | 0            | 0            | 0            |
| Livermore-9              | 0                 | 0              | 12           | 24           | 24           |
| Livermore-10             | 0                 | 0              | 0            | 24           | 24           |
| Livermore-11             | 17                | 100            | 92           | 100          | 100          |
| Livermore-12             | 61                | 100            | 100          | 100          | 100          |
| Livermore-13             | 55                | 96             | 84           | 100          | 100          |
| Livermore-14             | 0                 | 96             | 100          | 100          | 100          |
| Livermore-15             | 0                 | 92             | 96           | 100          | 100          |
| Livermore-16             | 4                 | 92             | 12           | 92           | 92           |
| Livermore-17             | 0                 | 64             | 4            | 68           | 68           |
| Livermore-18             | 0                 | 32             | 0            | 56           | 56           |
| Livermore-19             | 100               | 100            | 100          | 100          | 100          |
| Livermore-20             | 98                | 100            | 100          | 100          | 100          |
| Livermore-21             | 2                 | 12             | 64           | 24           | 24           |
| Livermore-22             | 3                 | 0              | 68           | 84           | 84           |
| <b>Livermore average</b> | 30.41             | 58.18          | 56.36        | <b>71.09</b> | <b>71.09</b> |
| <b>All average</b>       | 45.19             | 63.57          | 64.11        | <b>74.92</b> | <b>74.92</b> |

Table 6: Single-core runtimes of our algorithm on the Nguyen benchmark problem set.

| Benchmark  | Runtime (sec) |
|------------|---------------|
| Nguyen-1   | 27.05         |
| Nguyen-2   | 59.79         |
| Nguyen-3   | 151.06        |
| Nguyen-4   | 268.88        |
| Nguyen-5   | 501.65        |
| Nguyen-6   | 43.96         |
| Nguyen-7   | 752.32        |
| Nguyen-8   | 123.21        |
| Nguyen-9   | 31.17         |
| Nguyen-10  | 103.72        |
| Nguyen-11  | 66.50         |
| Nguyen-12* | 1057.11       |
| Average    | 265.54        |

Table 7: Comparison of mean root-mean-square error (RMSE) for our method to literature-reported values from DSR [Petersen et al., 2021] and Bayesian symbolic regression (BSR) [Jin et al., 2019] on the Jin benchmark problem set. Note that these benchmarks include floating-point constant values that are optimized as part of the reward function computation, as in Petersen et al. [2021]. Table 10 shows the formulas for these benchmarks.

|         | Mean RMSE |          |      |                   |
|---------|-----------|----------|------|-------------------|
|         | Ours      | DSR      | BSR  | Recovered by Ours |
| Jin-1   | <b>0</b>  | 0.46     | 2.04 | Yes               |
| Jin-2   | <b>0</b>  | <b>0</b> | 6.84 | Yes               |
| Jin-3   | <b>0</b>  | 0.00052  | 0.21 | Yes               |
| Jin-4   | <b>0</b>  | 0.00014  | 0.16 | Yes               |
| Jin-5   | <b>0</b>  | <b>0</b> | 0.66 | Yes               |
| Jin-6   | <b>0</b>  | 2.23     | 4.63 | Yes               |
| Average | <b>0</b>  | 0.45     | 2.42 |                   |

Table 8: Comparison of median root-mean-square error (RMSE) for our method to literature-reported values from DSR [Petersen et al., 2021] and *neat* genetic programming (Neat-GP) [Trujillo et al., 2016] on the Neat benchmark problem set. Note that Neat-6, Neat-7, and Neat-8 are not fully recoverable given the function set prescribed by the benchmark. Table 10 shows the formulas for these benchmarks.

|         | Median RMSE          |          |         | Recovered by Ours |
|---------|----------------------|----------|---------|-------------------|
|         | Ours                 | DSR      | Neat-GP |                   |
| Neat-1  | <b>0</b>             | <b>0</b> | 0.0779  | Yes               |
| Neat-2  | <b>0</b>             | <b>0</b> | 0.0576  | Yes               |
| Neat-3  | <b>0</b>             | 0.0041   | 0.0065  | Yes               |
| Neat-4  | <b>0</b>             | 0.0189   | 0.0253  | Yes               |
| Neat-5  | <b>0</b>             | <b>0</b> | 0.0023  | Yes               |
| Neat-6  | $6.1 \times 10^{-6}$ | 0.2378   | 0.2855  | —                 |
| Neat-7  | <b>1.0028</b>        | 1.0606   | 1.0541  | —                 |
| Neat-8  | <b>0.0228</b>        | 0.1076   | 0.1498  | —                 |
| Neat-9  | <b>0</b>             | 0.1511   | 0.1202  | Yes               |
| Average | <b>0.1139</b>        | 0.1756   | 0.1977  |                   |

Table 9: Benchmark symbolic regression problem specifications. Input variables are denoted by  $x$  and/or  $y$ .  $U(a, b, c)$  denotes  $c$  random points uniformly sampled between  $a$  and  $b$  for each input variable; training and test datasets use different random seeds.  $E(a, b, c)$  denotes  $c$  points evenly spaced between  $a$  and  $b$  for each input variable; training and test datasets use the same points. All benchmark problems use the following set of allowable tokens:  $\{+, -, \times, \div, \sin, \cos, \exp, \log, x, y\}$  ( $y$  is excluded for single-dimensional datasets).

| Name         | Expression                                          | Dataset            |
|--------------|-----------------------------------------------------|--------------------|
| Nguyen-1     | $x^3 + x^2 + x$                                     | $U(-1, 1, 20)$     |
| Nguyen-2     | $x^4 + x^3 + x^2 + x$                               | $U(-1, 1, 20)$     |
| Nguyen-3     | $x^5 + x^4 + x^3 + x^2 + x$                         | $U(-1, 1, 20)$     |
| Nguyen-4     | $x^6 + x^5 + x^4 + x^3 + x^2 + x$                   | $U(-1, 1, 20)$     |
| Nguyen-5     | $\sin(x^2) \cos(x) - 1$                             | $U(-1, 1, 20)$     |
| Nguyen-6     | $\sin(x) + \sin(x + x^2)$                           | $U(-1, 1, 20)$     |
| Nguyen-7     | $\log(x + 1) + \log(x^2 + 1)$                       | $U(0, 2, 20)$      |
| Nguyen-8     | $\sqrt{x}$                                          | $U(0, 4, 20)$      |
| Nguyen-9     | $\sin(x) + \sin(y^2)$                               | $U(0, 1, 20)$      |
| Nguyen-10    | $2 \sin(x) \cos(y)$                                 | $U(0, 1, 20)$      |
| Nguyen-11    | $x^y$                                               | $U(0, 1, 20)$      |
| Nguyen-12    | $x^4 - x^3 + \frac{1}{2}y^2 - y$                    | $U(0, 1, 20)$      |
| Nguyen-12*   | $x^4 - x^3 + \frac{1}{2}y^2 - y$                    | $U(0, 10, 20)$     |
| R-1          | $\frac{(x+1)^3}{x^2-x+1}$                           | $E(-1, 1, 20)$     |
| R-2          | $\frac{x^5-3x^3+1}{x^2+1}$                          | $E(-1, 1, 20)$     |
| R-3          | $\frac{x^6+x^5}{x^4+x^3+x^2+x+1}$                   | $E(-1, 1, 20)$     |
| R-1*         | $\frac{(x+1)^3}{x^2-x+1}$                           | $E(-10, 10, 20)$   |
| R-2*         | $\frac{x^5-3x^3+1}{x^2+1}$                          | $E(-10, 10, 20)$   |
| R-3*         | $\frac{x^6+x^5}{x^4+x^3+x^2+x+1}$                   | $E(-10, 10, 20)$   |
| Livermore-1  | $\frac{1}{3} + x + \sin(x^2)$                       | $U(-10, 10, 1000)$ |
| Livermore-2  | $\sin(x^2) \cos(x) - 2$                             | $U(-1, 1, 20)$     |
| Livermore-3  | $\sin(x^3) \cos(x^2) - 1$                           | $U(-1, 1, 20)$     |
| Livermore-4  | $\log(x + 1) + \log(x^2 + 1) + \log(x)$             | $U(0, 2, 20)$      |
| Livermore-5  | $x^4 - x^3 + x^2 - y$                               | $U(0, 1, 20)$      |
| Livermore-6  | $4x^4 + 3x^3 + 2x^2 + x$                            | $U(-1, 1, 20)$     |
| Livermore-7  | $\sinh(x)$                                          | $U(-1, 1, 20)$     |
| Livermore-8  | $\cosh(x)$                                          | $U(-1, 1, 20)$     |
| Livermore-9  | $x^9 + x^8 + x^7 + x^6 + x^5 + x^4 + x^3 + x^2 + x$ | $U(-1, 1, 20)$     |
| Livermore-10 | $6 \sin(x) \cos(y)$                                 | $U(0, 1, 20)$      |
| Livermore-11 | $\frac{x^2 y^2}{x+y}$                               | $U(-1, 1, 50)$     |
| Livermore-12 | $\frac{x^5}{y^3}$                                   | $U(-1, 1, 50)$     |
| Livermore-13 | $x^{\frac{1}{3}}$                                   | $U(0, 4, 20)$      |
| Livermore-14 | $x^3 + x^2 + x + \sin(x) + \sin(x^2)$               | $U(-1, 1, 20)$     |
| Livermore-15 | $x^{\frac{1}{5}}$                                   | $U(0, 4, 20)$      |
| Livermore-16 | $x^{\frac{2}{5}}$                                   | $U(0, 4, 20)$      |
| Livermore-17 | $4 \sin(x) \cos(y)$                                 | $U(0, 1, 20)$      |
| Livermore-18 | $\sin(x^2) \cos(x) - 5$                             | $U(-1, 1, 20)$     |
| Livermore-19 | $x^5 + x^4 + x^2 + x$                               | $U(-1, 1, 20)$     |
| Livermore-20 | $\exp(-x^2)$                                        | $U(-1, 1, 20)$     |
| Livermore-21 | $x^8 + x^7 + x^6 + x^5 + x^4 + x^3 + x^2 + x$       | $U(-1, 1, 20)$     |
| Livermore-22 | $\exp(-0.5x^2)$                                     | $U(-1, 1, 20)$     |

Table 10: Benchmark symbolic regression problems that include unknown constants. Input variables are denoted by  $x$  and/or  $y$ .  $U(a, b, c)$  denotes  $c$  random points uniformly sampled between  $a$  and  $b$  for each input variable; training and test datasets use different random seeds.  $E(a, b, c)$  denotes  $c$  points evenly spaced between  $a$  and  $b$  for each input variable; training and test datasets use the same points (except Neat-6, which uses  $E(1, 120, 120)$  as test data, and the Jin tests, which use  $U(-3, 3, 30)$  as test data). To simplify notation, libraries are defined relative to a “base” library  $\mathcal{L}_0 = \{+, -, \times, \div, \sin, \cos, \exp, \log, x\}$ . Placeholder operands are denoted by  $\bullet$ , e.g.  $\bullet^2$  corresponds to the square operator.

| Name   | Expression                                | Dataset            | Library                                                                       |
|--------|-------------------------------------------|--------------------|-------------------------------------------------------------------------------|
| Jin-1  | $2.5x^4 - 1.3x^3 + 0.5y^2 - 1.7y$         | $U(-3, 3, 100)$    | $\mathcal{L}_0 - \{\log\} \cup \{\bullet^2, \bullet^3, y, \text{const}\}$     |
| Jin-2  | $8.0x^2 + 8.0y^3 - 15.0$                  | $U(-3, 3, 100)$    | $\mathcal{L}_0 - \{\log\} \cup \{\bullet^2, \bullet^3, y, \text{const}\}$     |
| Jin-3  | $0.2x^3 + 0.5y^3 - 1.2y - 0.5x$           | $U(-3, 3, 100)$    | $\mathcal{L}_0 - \{\log\} \cup \{\bullet^2, \bullet^3, y, \text{const}\}$     |
| Jin-4  | $1.5 \exp(x) + 5.0 \cos(y)$               | $U(-3, 3, 100)$    | $\mathcal{L}_0 - \{\log\} \cup \{\bullet^2, \bullet^3, y, \text{const}\}$     |
| Jin-5  | $6.0 \sin(x) \cos(y)$                     | $U(-3, 3, 100)$    | $\mathcal{L}_0 - \{\log\} \cup \{\bullet^2, \bullet^3, y, \text{const}\}$     |
| Jin-6  | $1.35xy + 5.5 \sin((x - 1.0)(y - 1.0))$   | $U(-3, 3, 100)$    | $\mathcal{L}_0 - \{\log\} \cup \{\bullet^2, \bullet^3, y, \text{const}\}$     |
| Neat-1 | $x^4 + x^3 + x^2 + x$                     | $U(-1, 1, 20)$     | $\mathcal{L}_0 \cup \{1\}$                                                    |
| Neat-2 | $x^5 + x^4 + x^3 + x^2 + x$               | $U(-1, 1, 20)$     | $\mathcal{L}_0 \cup \{1\}$                                                    |
| Neat-3 | $\sin(x^2) \cos(x) - 1$                   | $U(-1, 1, 20)$     | $\mathcal{L}_0 \cup \{1\}$                                                    |
| Neat-4 | $\log(x + 1) + \log(x^2 + 1)$             | $U(0, 2, 20)$      | $\mathcal{L}_0 \cup \{1\}$                                                    |
| Neat-5 | $2 \sin(x) \cos(y)$                       | $U(-1, 1, 100)$    | $\mathcal{L}_0 \cup \{y\}$                                                    |
| Neat-6 | $\sum_{k=1}^x \frac{1}{k}$                | $E(1, 50, 50)$     | $\{+, \times, \div, \bullet^{-1}, -\bullet, \sqrt{\bullet}, x\}$              |
| Neat-7 | $2 - 2.1 \cos(9.8x) \sin(1.3y)$           | $E(-50, 50, 10^5)$ | $\mathcal{L}_0 \cup \{\tan, \tanh, \bullet^2, \bullet^3, \sqrt{\bullet}, y\}$ |
| Neat-8 | $\frac{e^{-(x-1)^2}}{1.2+(y-2.5)^2}$      | $U(0.3, 4, 100)$   | $\{+, -, \times, \div, \exp, e^{-\bullet}, \bullet^2, x, y\}$                 |
| Neat-9 | $\frac{1}{1+x^{-4}} + \frac{1}{1+y^{-4}}$ | $E(-5, 5, 21)$     | $\mathcal{L}_0 \cup \{y\}$                                                    |

Table 11: Hyperparameter values for all experiments, unless otherwise noted. If an applicable hyperparameter value differs from one of the baseline methods, it is noted.

| Hyperparameter            | Symbol   | Value         | Comment                                                     |
|---------------------------|----------|---------------|-------------------------------------------------------------|
| <b>Shared Parameters</b>  |          |               |                                                             |
| Batch/population size     | $N$      | 500           | Petersen et al. [2021]: 1000<br>Fortin et al. [2012]: 300   |
| Minimum expression length | –        | 4             | –                                                           |
| Maximum expression length | –        | 30            | –                                                           |
| Maximum expressions       | –        | 2,000,000     | –                                                           |
| Maximum constants         | –        | $\infty$      | Petersen et al. [2021]: 3<br>(only used for Jin benchmarks) |
| Reward/fitness function   | $R$      | Inverse NRMSE | –                                                           |
| <b>RNN Parameters</b>     |          |               |                                                             |
| Optimizer                 | –        | Adam          | –                                                           |
| RNN cell type             | –        | LSTM          | –                                                           |
| RNN cell layers           | –        | 1             | –                                                           |
| RNN cell size             | –        | 32            | –                                                           |
| Training method           | –        | PQT           | –                                                           |
| PQT queue size            | –        | 10            | –                                                           |
| Sample selection size     | $M$      | 1             | –                                                           |
| Learning rate             | $\alpha$ | 0.0025        | Petersen et al. [2021]: 0.0005                              |
| Entropy weight            | –        | 0.005         | –                                                           |
| <b>GP Parameters</b>      |          |               |                                                             |
| Generations per iteration | $S$      | 25            | –                                                           |
| Crossover operator        | –        | One Point     | –                                                           |
| Crossover probability     | $P_c$    | 0.5           | –                                                           |
| Mutation operator         | –        | Multiple      | Fortin et al. [2012]: Uniform                               |
| Mutation probability      | $P_m$    | 0.5           | Fortin et al. [2012]: 0.1                                   |
| Selection operator        | –        | Tournament    | –                                                           |
| Tournament size           | $k$      | 5             | Fortin et al. [2012]: 3                                     |
| Mutate tree maximum       | –        | 3             | Fortin et al. [2012]: 2                                     |

Table 12: Additional ablations when using original hyperparameter values from Petersen et al. [2021] and/or Fortin et al. [2012] rather than the values in Table 11.

|                                     | Recovery rate (%) |            |            |            |
|-------------------------------------|-------------------|------------|------------|------------|
|                                     | All               | Nguyen     | R          | Livermore  |
| Mutation probability $P_m = 0.1$    | 75.24             | 90.33      | 32.00      | 72.91      |
| Baseline (Table 11 values)          | 74.92             | 92.33      | 33.33      | 71.09      |
| Tournament size $k = 3$             | 73.62             | 92.00      | 29.33      | 69.64      |
| Batch size $N = 1000$               | 72.11             | 93.33      | 25.33      | 66.91      |
| RNN learning rate $\alpha = 0.0005$ | 71.03             | 91.67      | 22.67      | 66.36      |
| 95% confidence interval             | $\pm 1.54$        | $\pm 1.76$ | $\pm 2.81$ | $\pm 1.32$ |

Table 13: Recovery rates when using the soft length prior (SLP) and hierarchical entropy regularizer (HER) introduced in Landajuela et al. [2021a], and increasing maximum length from 30 to 100. These results are post-hoc, as Landajuela et al. [2021a] was performed concurrently.

|                          | Recovery rate (%) |                |
|--------------------------|-------------------|----------------|
|                          | Ours              | Ours + SLP/HER |
| Nguyen-1                 | 100               | 100            |
| Nguyen-2                 | 100               | 100            |
| Nguyen-3                 | 100               | 100            |
| Nguyen-4                 | 100               | 100            |
| Nguyen-5                 | 100               | 100            |
| Nguyen-6                 | 100               | 100            |
| Nguyen-7                 | 96                | 100            |
| Nguyen-8                 | 100               | 100            |
| Nguyen-9                 | 100               | 100            |
| Nguyen-10                | 100               | 100            |
| Nguyen-11                | 100               | 100            |
| Nguyen-12*               | 12                | 4              |
| <b>Nguyen average</b>    | <b>92.33</b>      | <b>92.00</b>   |
| R-1*                     | 4                 | 100            |
| R-2*                     | 4                 | 100            |
| R-3*                     | 92                | 96             |
| <b>R average</b>         | <b>33.33</b>      | <b>98.67</b>   |
| Livermore-1              | 100               | 100            |
| Livermore-2              | 100               | 100            |
| Livermore-3              | 100               | 100            |
| Livermore-4              | 100               | 100            |
| Livermore-5              | 4                 | 40             |
| Livermore-6              | 88                | 100            |
| Livermore-7              | 0                 | 4              |
| Livermore-8              | 0                 | 0              |
| Livermore-9              | 24                | 88             |
| Livermore-10             | 24                | 8              |
| Livermore-11             | 100               | 100            |
| Livermore-12             | 100               | 100            |
| Livermore-13             | 100               | 100            |
| Livermore-14             | 100               | 100            |
| Livermore-15             | 100               | 100            |
| Livermore-16             | 92                | 100            |
| Livermore-17             | 68                | 36             |
| Livermore-18             | 56                | 48             |
| Livermore-19             | 100               | 100            |
| Livermore-20             | 100               | 100            |
| Livermore-21             | 24                | 88             |
| Livermore-22             | 84                | 92             |
| <b>Livermore average</b> | <b>71.09</b>      | <b>77.45</b>   |
| <b>All average</b>       | <b>74.92</b>      | <b>83.89</b>   |
